# Supplementary material for: An elemental ferroelectric topological insulator in ψ-bismuthene
Source: Royal Society of Chemistry journal article supplement (doi:10.1039/d4cp03456b), 2024-01-01
Supplement: d4cp03456b1.pdf [file d4cp03456b1.pdf]

## Supplementary Material

### Elemental ferroelectric topological insulator in $\psi$ -bismuthene

Xuening Han,<sup>1</sup> Fulu Zheng,<sup>\*2</sup> Thomas Frauenheim,<sup>3</sup> Pei Zhao,<sup>1</sup> and Yan Liang,<sup>1,\*</sup>

<sup>1</sup>College of Physics and Optoelectronic Engineering, Faculty of Information Science and Engineering, Ocean University of China, Songling Road 238, Qingdao 266100, People's Republic of China;

<sup>2</sup>Bremen Center for Computational Materials Science, University of Bremen, 28359 Bremen, Germany;

<sup>3</sup>School of Science, Constructor University, Bremen 28759, Germany.

\*E-mail: fzheng@uni-bremen.de; yliang.phy@ouc.edu.cn

Note 1

To confirm the nontrivial topological order in  $\psi$ -bismuthene, the  $\mathbf{Z}_2$  invariant is obtained by tracking the evolution of the Wannier charge center (WCC).<sup>1,2</sup> The Wannier functions (WFs) with regard to the lattice vector  $\mathbf{R}$  is written as:<sup>3</sup>

$$|Rn\rangle = \frac{1}{2\pi} \int_{-\pi}^{\pi} dk e^{-ik(R-x)} |u_{nk}\rangle$$

The WFs depend on the gauge choice for the Bloch states  $|u_{nk}\rangle$ . Following Soluyanov and Vanderbilt's description, to optimally localize the WFs, the WCCs are defined as the mean value of the position operator defined by the mean value of  $\bar{x}_n = \langle 0_n | \hat{X} | 0_n \rangle$ , where the  $\hat{X}$  represent the position operator and  $|0_n\rangle$  is the state corresponding to a WF in the cell with  $\mathbf{R} = 0$ .<sup>4</sup> Then we obtain

$$\bar{x}_n = \frac{i}{2\pi} \int_{-\pi}^{\pi} dk \langle u_{nk} | \nabla_k | u_{nk} \rangle$$

Taking into account that  $\sum_{\alpha} \bar{x}_{\alpha}^S = \frac{1}{2\pi} \int_{BZ} A^S$  for  $S = \text{I or II}$ , the summation in  $\alpha$  is the occupied states and  $A$  is Berry connection, yielding the  $\mathbf{Z}_2$  invariant following

$$Z_2 = \sum_{\alpha} [\bar{x}_{\alpha}^I\left(\frac{T}{2}\right) - \bar{x}_{\alpha}^{II}\left(\frac{T}{2}\right)] - \sum_{\alpha} [\bar{x}_{\alpha}^I(0) - \bar{x}_{\alpha}^{II}(0)]$$

here I and II are the Kramer partners. The identification of  $\mathbf{Z}_2$  invariant can be obtained by counting the numbers of crossing between any arbitrary horizontal reference line and evolution of the WCCs, in which the odd number equals to  $\mathbf{Z}_2 = 1$ , revealing the nontrivial topological nature.

Since the bands near the Fermi level are primarily contributed by the  $p$  orbitals of Bi atoms, these orbitals are selected as projections to construct the maximally localized Wannier functions (MLWFs).<sup>4</sup>

<sup>6</sup> A total of 48 bands, spanning discrete bands 17 to 64, along with 4 additional empty bands within the energy window of -6 to 6 eV relative to the Fermi level, are chosen for disentanglement, resulting in a set of well-localized WFs. Additionally, the spin Hall conductivity and Berry curvature calculations are performed using the Wannier interpolation method.<sup>7,8</sup>

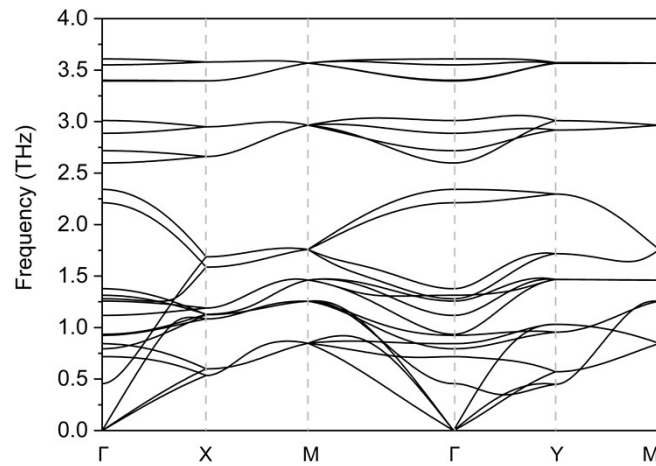

Fig. S1. Phonon spectrum for the 2D elemental  $\psi$ -bismuthene.

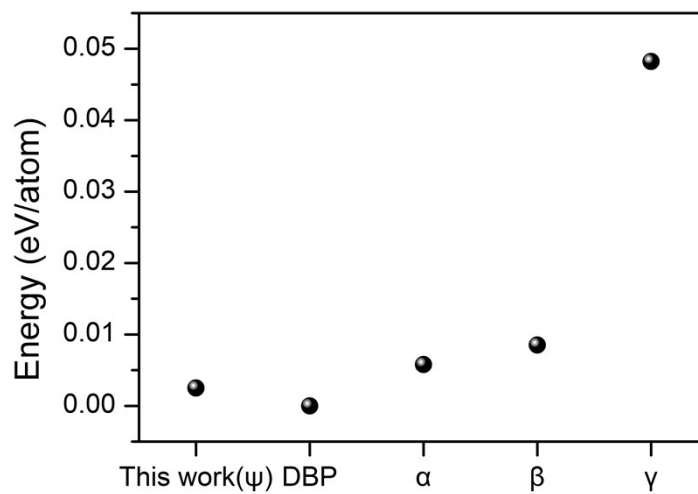

Fig. S2. Calculated binding energy difference between  $\psi$ , DBP,  $\alpha$ ,  $\beta$ , and  $\gamma$  bismuthene monolayers.

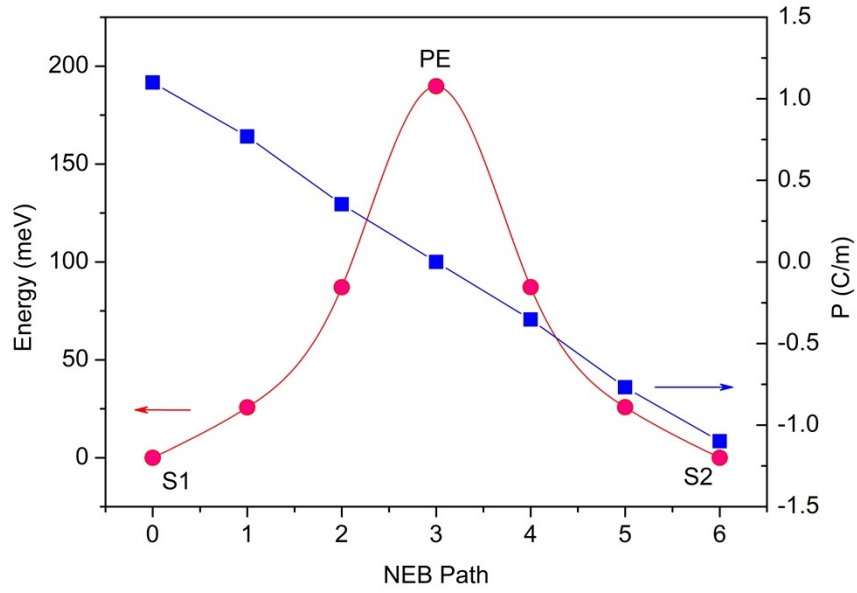

Fig. S3. The evolution of polarization  $P$  and energy landscape of the structural switching process between the energy-degenerate polarization states  $S1$  and  $S2$ .

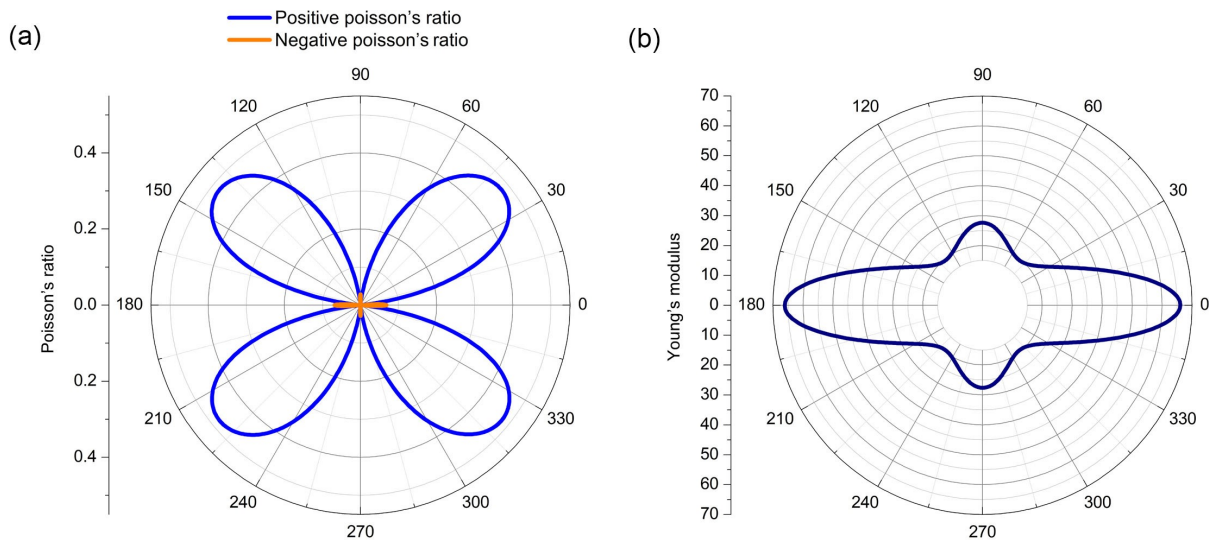

Fig. S4. (a) Poisson's ratio and (b) Young's modulus of  $\psi$ -bismuthene as a function of arbitrary angle.

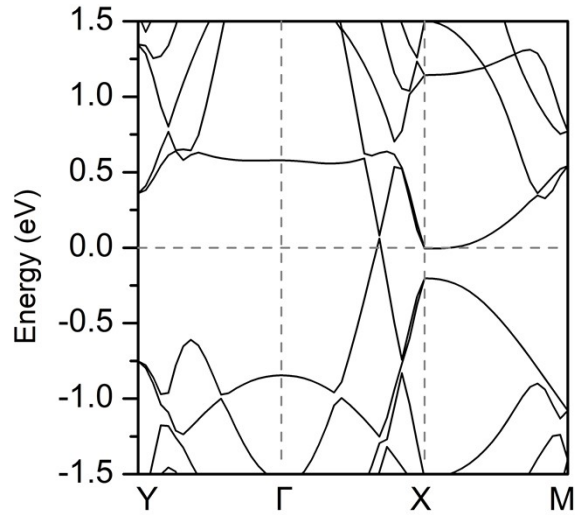

Fig. S5. Band structure of  $\psi$ -bismuthene calculated by Nanodcal using the mode-conservation pseudopotential and linear atomic orbit combination basis set.

## References

1. L. Fu and C. L. Kane, *Phys. Rev. B*, 2006, **74**, 195312.
2. M. Taherinejad, K. F. Garrity and D. Vanderbilt, *Phys. Rev. B*, 2014, **89**, 115102.
3. A. A. Soluyanov and D. Vanderbilt, *Phys. Rev. B*, 2011, **83**, 235401.
4. N. Marzari and D. Vanderbilt, *Phys. Rev. B*, 1997, **56**, 12847.
5. N. Marzari, A. A. Mostofi, J. R. Yates, I. Souza and D. Vanderbilt, *Rev. Mod. Phys.*, 2012, **84**, 1419-1475.
6. I. Souza, N. Marzari and D. Vanderbilt, *Phys. Rev. B*, 2001, **65**, 035109.
7. J. H. Ryoo, C. H. Park and I. Souza, *Phys. Rev. B*, 2019, **99**, 235113.
8. J. Qiao, J. Zhou, Z. Yuan and W. Zhao, *Phys. Rev. B*, 2018, **98**, 214402.
